# Supplementary material for: Gender Differences in Cardiac Organ Damage in Arterial Hypertension: Assessing the Role of Drug Nonadherence
Source: Springer Nature journal article supplement (doi:10.1007/s40292-024-00632-6), 2024-03-26
Supplement: MOESM1 [file 26897970]

**Gender differences in cardiac organ damage in hypertension: Assessing the role of drug nonadherence**

Arleen Aune<sup>a,b</sup>, Annabel Ohldieck<sup>a,b</sup>, Lene V. Halvorsen<sup>c,d,e</sup>, Karl Marius Brobak<sup>f,g</sup>, Eirik Olsen<sup>h</sup>, Stine Rognstad<sup>c,i</sup>, Anne Cecilie K. Larstorp<sup>c,e,j</sup>, Camilla L. Sørås<sup>c,e,k</sup>, Anne B. Rossebø<sup>l</sup>, Assami Rösner<sup>m</sup>, Marianne Aa. Grytaas<sup>n</sup>, Eva Gerds<sup>a,b</sup>

<sup>a</sup> Department of Clinical Science, University of Bergen, Bergen, Norway; <sup>b</sup> Department of Heart Disease, Haukeland University Hospital, Bergen, Norway; <sup>c</sup> Section for Cardiovascular and Renal Research, Oslo University Hospital Ullevål, Oslo, Norway; <sup>d</sup> Department of Nephrology, Oslo University Hospital Ullevål, Oslo, Norway; <sup>e</sup> Institute of Clinical Medicine, University of Oslo, Norway; <sup>f</sup> Section of Nephrology, The Arctic University of Norway, Tromsø, Norway; <sup>g</sup> Renal Research Group, UiT The Arctic University of Norway, Tromsø, Norway; <sup>h</sup> Department of Emergency Medicine, St. Olavs University Hospital, Trondheim, Norway; <sup>i</sup> Department of Pharmacology, Oslo University Hospital Ullevål, Oslo, Norway; <sup>j</sup> Department of Medical Biochemistry, Oslo University Hospital Ullevål, Oslo, Norway; <sup>k</sup> Section for Environmental and Occupational Medicine, Oslo University Hospital Ullevål; <sup>l</sup> Department of Cardiology, Oslo University Hospital Ullevål, Oslo, Norway; <sup>m</sup> Department of Clinical Medicine, UiT, The Arctic University, Tromsø, Norway <sup>n</sup> Department of Medicine, Haukeland University Hospital, Bergen, Norway;

**Table S1. Covariables of LV hypertrophy in women and men with uncontrolled hypertension, uni- and multivariable logistic regression analysis. Secondary models.**

| Variable                             | All, n=523              |                           | Women, n=186            |                           | Men, n=337              |                           |
|--------------------------------------|-------------------------|---------------------------|-------------------------|---------------------------|-------------------------|---------------------------|
|                                      | Univariable OR (95% CI) | Multivariable OR (95% CI) | Univariable OR (95% CI) | Multivariable OR (95% CI) | Univariable OR (95% CI) | Multivariable OR (95% CI) |
| Female sex                           | 1.66(1.15-2.41)*        | 2.01(1.30-3.10)*          | n.a.                    | n.a.                      | n.a.                    | n.a.                      |
| Nonadherence                         | 1.33(0.71-12.49)        | 1.96 (0.91-4.22)          | 1.72(0.57-5.18)         | 3.10 (0.81-11.94)         | 1.21(0.56-2.66)         | 1.54 (0.60-3.94)          |
| Age (years)                          | 1.02(1.00-1.04)*        | 1.04 (1.01-1.06)*         | 1.00(0.97-1.03)         | 1.02 (0.98-1.06)          | 1.03(1.00-1.06)*        | 1.04 (1.01-1.07)*         |
| Body mass index (kg/m <sup>2</sup> ) | 1.13(1.09-1.17)*        | 1.15 (1.10-1.20)*         | 1.13(1.07-1.20)*        | 1.16 (1.09-1.24)*         | 1.13(1.08-1.19)*        | 1.13 (1.06-1.20)*         |
| 24-h systolic BP (mmHg)              | 1.05(1.03-1.07)*        | 1.03 (1.01-1.06)*         | 1.05(1.01-1.08)*        | 1.03 (1.00-1.07)          | 1.06(1.03-1.09)*        | 1.04 (1.01-1.07)*         |
| Duration of hypertension (years)     | 1.02(1.02-1.03)*        | 1.00 (0.98-1.02)          | 1.03(1.00-1.06)*        | 1.02 (1.00-1.05)          | 1.00(0.98-1.03)         |                           |
| ACR ≥ 3 mg/mmol                      | 1.91 (1.27-2.87)*       | 1.70 (1.03-2.82)*         | 2.38 (1.09-5.19)*       | 1.66 (0.68-4.06)          | 2.01 (1.22-3.92)*       | 1.58 (0.89-2.78)          |
| Type 2 diabetes mellitus             | 1.44(0.94-2.22)*        | 1.02 (0.61-1.73)          | 2.17(1.01-4.69)*        | 1.25 (0.50-3.12)          | 1.25(0.73-2.14)         |                           |
| Hypercholesterolemia                 | 1.44(0.94-2.22)*        | 1.22 (0.80-1.87)          | 1.08(0.60-1.92)         |                           | 1.71(1.08-2.71)*        | 1.32 (0.78-2.33)          |
| Cardiovascular disease               | 1.64(1.05-2.55)*        | 1.41 (0.85-2.33)          | 1.21(0.60-2.46)         |                           | 1.94(1.10-3.43)*        | 1.66 (0.89-3.12)          |

\*p<0.05

BP, blood pressure; ACR, albumin-creatinine ratio; OR, odds ratio; CI, confidence interval; n.a., not applicable

**Table S2. Covariables of LV hypertrophy in women and men with uncontrolled hypertension, uni- and multivariable logistic regression analysis including elevated ARR.**

| Variable                             | All, n=523              |                           | Women, n=186            |                           | Men, n=337              |                           |
|--------------------------------------|-------------------------|---------------------------|-------------------------|---------------------------|-------------------------|---------------------------|
|                                      | Univariable OR (95% CI) | Multivariable OR (95% CI) | Univariable OR (95% CI) | Multivariable OR (95% CI) | Univariable OR (95% CI) | Multivariable OR (95% CI) |
| Female sex                           | 1.66 (1.15-2.41)*       | 2.00(1.28-3.10)*          | n.a.                    | n.a.                      | n.a.                    | n.a.                      |
| Nonadherence                         | 1.33 (0.71-12.49)       | 1.86 (0.84-4.12)          | 1.72(0.57-5.18)         | 3.90 (0.80-18.90)         | 1.21(0.56-2.66)         | 1.39 (0.52-3.73)          |
| Age (years)                          | 1.02 (1.00-1.04)*       | 1.03 (1.01-1.06)*         | 1.00(0.97-1.03)         | 1.02 (0.98-1.06)          | 1.03(1.00-1.06)*        | 1.05 (1.01-1.08)*         |
| Body mass index (kg/m <sup>2</sup> ) | 1.13 (1.09-1.17)*       | 1.15 (1.10-1.20)*         | 1.13(1.07-1.20)*        | 1.16 (1.08-1.25)*         | 1.13(1.08-1.19)*        | 1.12 (1.05-1.20)*         |
| 24-h systolic BP (mmHg)              | 1.05 (1.03-1.07)*       | 1.02 (1.00-1.05)          | 1.05(1.01-1.08)*        | 1.02 (0.98-1.06)          | 1.06(1.03-1.09)*        | 1.03 (1.00-1.06)          |
| Duration of hypertension (years)     | 1.02 (1.02-1.03)*       | 1.00 (0.98-1.02)          | 1.03(1.00-1.06)*        | 1.03 (0.99-1.06)          | 1.00(0.98-1.03)         | 0.98 (0.96-1.01)          |
| ACR ≥ 3 mg/mmol                      | 1.91 (1.27-2.87)*       | 1.72 (1.04-2.87)*         | 2.38 (1.09-5.19)*       | 1.84 (0.70-4.79)          | 2.01 (1.22-3.92)*       | 1.69 (0.91-3.15)          |
| Type 2 diabetes mellitus             | 1.44 (0.94-2.22)*       | 1.03 (0.61-1.77)          | 2.17(1.01-4.69)*        | 1.16 (0.44-3.09)          | 1.25(0.73-2.14)         | 0.99 (0.51-1.92)          |
| Hypercholesterolemia                 | 1.44 (0.94-2.22)*       | 1.31 (0.85-2.01)          | 1.08(0.60-1.92)         | 1.13 (0.56-2.31)          | 1.71(1.08-2.71)*        | 1.47 (0.84-2.58)          |
| Cardiovascular disease               | 1.64 (1.05-2.55)*       | 1.40 (0.83-2.35)          | 1.21(0.60-2.46)         | 1.18 (0.48-2.92)          | 1.94(1.10-3.43)*        | 1.39 (0.72-2.71)          |
| Elevated ARR                         | 2.08 (1.38-3.13)*       | 1.78 (1.10-2.89)*         | 1.39 (0.72-2.67)        | 1.48 (0.67-3.28)          | 2.62 (1.55-4.44)*       | 2.12 (1.12-4.00)*         |

\*p<0.05

BP, blood pressure; ACR, albumin-creatinine ratio; ARR, aldosterone-to-renin; OR, odds ratio; CI, confidence interval n.a., not applicable

**Table S3. Covariables of left atrium enlargement in women and men with uncontrolled hypertension, uni- and multivariable logistic regression analysis. Secondary models.**

| Variable                             | All, n=523              |                           | Women, n= 186           |                           | Men, n= 337             |                           |
|--------------------------------------|-------------------------|---------------------------|-------------------------|---------------------------|-------------------------|---------------------------|
|                                      | Univariable OR (95% CI) | Multivariable OR (95% CI) | Univariable OR (95% CI) | Multivariable OR (95% CI) | Univariable OR (95% CI) | Multivariable OR (95% CI) |
| Female sex                           | 2.07(1.35-3.17)*        | 1.90 (1.17-3.10)*         | n.a.                    | n.a.                      | n.a.                    | n.a.                      |
| Drug nonadherence                    | 0.50(0.27-0.94)*        | 0.48 (0.23-1.00)*         | 0.44(0.14-1.39)         | 0.38(0.07-1.96)           | 0.55(0.26-1.15)         | 0.49(0.21-1.10)           |
| Age (years)                          | 1.04(1.02-1.06)*        | 1.03 (1.01-1.06)*         | 1.01(0.98-1.04)         | 1.01(0.96-1.04)           | 1.05(1.02-1.07)*        | 1.04 (1.01-1.07)*         |
| Body mass index (kg/m <sup>2</sup> ) | 1.09(1.05-1.13)*        | 1.10 (1.04-1.15)*         | 1.13(1.05-1.22)*        | 1.11(1.01-1.22)*          | 1.09(1.03-1.15)*        | 1.07 (1.01-1.14)*         |
| 24-h systolic BP (mmHg)              | 1.05(1.02-1.07)*        | 1.03 (1.00-1.06)*         | 1.07(1.02-1.13)*        | 1.05(0.99-1.10)           | 1.04(1.01-1.07)*        | 1.02 (0.99-1.06)          |
| Duration of hypertension (years)     | 1.02(1.00-1.04)*        | 1.00 (0.98-1.02)          | 1.02(0.98-1.05)         |                           | 1.02(0.10-1.04)         |                           |
| ACR ≥ 3 mg/mmol                      | 1.60(1.99-2.55)         | 1.20 (0.70-2.04)          | 1.19(0.45-3.14)         |                           | 1.97(1.15-3.38)*        | 1.26 (0.70-2.27)          |
| LV hypertrophy                       | 4.77(2.92-7.79)*        | 3.09 (1.84-5.27)*         | 12.88(3.78-43.88)*      | 6.50(1.96-21.54)*         | 3.28(1.13-3.66)*        | 2.50 (1.38-4.55)*         |
| Mitral valve regurgitation           | 2.19(1.46-3.29)*        | 2.22 (1.41-3.50)*         | 4.36(1.86-10.20)*       | 5.62(2.15-14.70)*         | 1.61(1.00-2.60)         |                           |
| Atrial fibrillation                  | 1.39(0.75-2.58)         |                           | 0.51(0.18-1.44)         |                           | 2.26(1.04-4.89)*        | 1.77(0.76-4.15)           |

\*p<0.05

BP, blood pressure; ACR, albumin-creatinine ratio; LV, left ventricular; OR, odds ratio; CI, confidence interval n.a., not applicable
